# Supplementary material
Source: bioRxiv or medRxiv preprint supplement (https://www.biorxiv.org/highwire/filestream/27418/field_highwire_adjunct_files/0/096909-1.pdf)
Supplement: Supplementary file [file 096909-1.pdf]

1 **Supplementary file 1: Environment determines evolutionary**  
2 **trajectory in a constrained phenotypic space**

3 David T. Fraebel, Harry Mickalide, Diane Schnitkey,  
4 Jason Merritt, Thomas E. Kuhlman, Seppe Kuehn  
5 (Dated: December 22, 2016)

6 **CONTENTS**

|    |                                                                                        |    |
|----|----------------------------------------------------------------------------------------|----|
| 7  | I. Additional selection experiments                                                    | 2  |
| 8  | II. Measurements of growth rates                                                       | 3  |
| 9  | III. Numerical simulations of reaction-diffusion model                                 | 4  |
| 10 | IV. Relationship between single-cell behavior and front migration                      | 4  |
| 11 | V. The effect of boundary interactions in microfluidic device on run-tumble statistics | 6  |
| 12 | VI. Comparison of rich medium round 15 strain with RP437                               | 7  |
| 13 | VII. Experimental details of mutant reconstruction                                     | 7  |
| 14 | A. Preparation and electroporation of electrocompetent cells                           | 7  |
| 15 | B. Synthesis and integration of the landing pad                                        | 8  |
| 16 | C. Integration of desired mutation                                                     | 9  |
| 17 | VIII. Modeling evolution of correlated traits                                          | 9  |
| 18 | IX. Estimated change in drag due to change in growth rate                              | 10 |
| 19 | References                                                                             | 32 |

20 **I. ADDITIONAL SELECTION EXPERIMENTS**

21 We performed selection on the motile but non-chemotactic mutant  $\Delta cheA-Z$  in the same  
22 genetic background used for all other experiments (MG1655-motile). In rich medium, we  
23 observed migration an order of magnitude slower than the wild-type and only a small increase  
24 in  $s$  over 10 rounds of selection (Figure 1 - figure supplement 1). In this experiment each  
25 round of selection lasted 24 hours to permit this strain to form colonies large enough for  
26 reliable sampling. In minimal medium the non-chemotactic mutant formed no measurable  
27 front during 48 hours of incubation and selection, performed by sampling from the periphery  
28 of this colony, resulted in only a very small increase in migration rate in one replicate after  
29 7 rounds of selection. For the minimal medium experiment antibiotics were used to limit

30 the possibility of contamination and the  $\Delta cheA-Z$  deletion was confirmed by PCR.

31 We performed selection in rich medium where populations were sampled every 12 hours  
32 from a point halfway the center of the colony and the outer edge; results are shown in Figure  
33 1 - figure supplement 3. When sampling at this location we observed slower adaptation and  
34 a reduction in the maximum rate of expansion compared to populations selected by sampling  
35 at the migrating front.

36 Since previous work has shown that non-genetic diversity can be important in chemo-  
37 taxis and front migration.<sup>1,2</sup> To test whether the adaptation we observe has a genetic basis,  
38 we asked whether long-term growth in liquid culture resulted in loss of the fast migration  
39 phenotype. We inoculated a strain isolated after 15 rounds of selection in rich medium (Fig-  
40 ure 1(c), main text, replicate 1) into a custom turbidostat that maintained a population of  
41  $\sim 10^9$  cells under well mixed and constant temperature conditions. We inoculated soft agar  
42 plates from this continuous culture at regular intervals over approximately 140 generations  
43 of growth in liquid culture. We observed no decrease in the rate of migration due to pro-  
44 longed growth in liquid culture (Figure 1 - figure supplement 5), suggesting that non-genetic  
45 variation likely does not play a large role in the adaptation we observed.

## 46 II. MEASUREMENTS OF GROWTH RATES

47 Growth rate measurements were performed using custom-built optical density measure-  
48 ment device.<sup>3</sup> Briefly, this device used an infrared LED and a photodetector to measure  
49 the transmitted light passing through a culture vial. The LED and photodetector were  
50 embedded in an aluminum block that was temperature controlled by a Peltier element and  
51 PID feedback software. Strains were inoculated from overnight culture into 20 mL vials of  
52 the appropriate medium stirred at 850 rpm and maintained at 30 °C. The growth rate was  
53 measured by linear regression of  $\log(OD(t))$  over a 150 to 200 minute window where the  
54 change in OD is determined to be exponential by inspecting the residuals. We checked that  
55 the conclusions in Figure 3, Figure 3 - figure supplement 3 and Figure 4 – figure supplement  
56 2 did not depend qualitatively on the time interval used in fitting the optical density curves.

### 57 III. NUMERICAL SIMULATIONS OF REACTION-DIFFUSION MODEL

58 Under the assumptions of vertical uniformity in the plate and azimuthal symmetry, the  
59 numerical integration of equations (1) and (2) in the main text was coded in C++ as a one  
60 dimensional lattice representing a horizontal line projecting from the center of the plate to  
61 the edge. Each lattice site had both a food/attractant density ( $c(\mathbf{r}, t)$ , initially uniform) and  
62 a bacterial surface density ( $\rho(\mathbf{r}, t)$ , with an initial inoculum corresponding to  $1.4 \times 10^8$  cells  
63  $\text{ml}^{-1}$  at the center). A lattice spacing of 0.15 mm was used with a step time of 0.0625 min;  
64 every step the entire system was updated according to the model (in cylindrical coordinates)  
65 using standard nearest-neighbor finite difference equations for the first and second derivatives  
66 on a lattice. To prevent seeding the far end of the plate with bacteria in nonphysical time,  
67 densities greater than 100 cells  $\text{ml}^{-1}$  were required to seed a lattice site as the bacteria  
68 propagated outward. Changing this threshold did not alter the results. The front position  
69 was determined by finding the first local maximum in  $\rho$  from the edge of the plate. Front  
70 velocities were determined via linear fit on front position with time. Examples of simulation  
71 outputs are shown in Figure 2 – figure supplement 1. Parameters for our simulation in both  
72 rich and minimal medium were either measured or taken from the literature and values are  
73 given in Table 11 of the main text.

### 74 IV. RELATIONSHIP BETWEEN SINGLE-CELL BEHAVIOR AND FRONT MI- 75 GRATION

76 The relationship between single-cell swimming parameters ( $v_r$ ,  $\tau_r$  and  $\tau_t$ ) and population  
77 transport parameters ( $k_0$  and  $D_b$ ) has been described in detail elsewhere.<sup>4-6</sup> Here we summa-  
78 rize the results of these calculations and give details for the estimates given in the main text.  
79 Rivero *et al.*<sup>4</sup> considered chemotaxis in one spatial dimension by considering the dynamics  
80 of two populations of cells: those moving left and those moving right at constant speed  
81  $|v_r|$ . They neglect variation in  $|v_r|$  across the population and time; they also treat tumbles  
82 as instantaneous. They define the probability that a cell swimming to right tumbles and  
83 begins swimming to the left as  $\alpha^+$  and the converse as  $\alpha^-$ . Under these assumptions they  
84 show that

$$D_b = \frac{2v_r^2}{\alpha^+ + \alpha^-} \quad (1)$$

85 and

$$k_0 = v_r \frac{\alpha^- - \alpha^+}{\alpha^+ + \alpha^-}. \quad (2)$$

86 Note that the tumble frequency is  $\alpha_0 = \alpha^+ + \alpha^-$ . As discussed in the main text, Croze *et*  
 87 *al.* use this as a starting point for deriving a relationship between the transport parameters  
 88  $D_b$  and  $k_0$  and the behavioral parameters  $|v_r|$  and  $\tau_r$ . For completeness we give the main  
 89 results of their derivation here; for further details see Appendix A of reference.<sup>5</sup> First, *E.*  
 90 *coli* modifies its tumble frequency in response to environment according to

$$\alpha(t) = \alpha_0 \left[ 1 - \int_{-\infty}^t dt' K(t-t') f_{k_0}(x(t')) \right] \quad (3)$$

91 where  $\alpha_0$  is the unstimulated tumble frequency,  $x$  is a spatial coordinate and the integral  
 92 contains the response function  $(K)^7$  and  $f_{k_0} = c(x)/(c(x) + K_D)$  describes the binding of  
 93 an attractant at concentration  $c(x)$  to the relevant receptor. Experimentally, it has been  
 94 shown that  $\int_{-\infty}^{\infty} dt K(t) = 0.7$ . We proceed by assuming that the effective tumble frequency  
 95 due to collisions with the agar can be written as  $\alpha_e(t, C) = \alpha(t) + \alpha_A(C)$ . The authors then  
 96 compute an average run duration given  $\alpha_e(t, C)$ . We note that in this derivation,  $f_{k_0}$  is  
 97 expanded and truncated to first order. The result is

$$D_b(C) = \frac{v_r^2}{\alpha_0} \frac{1}{(1 + \alpha_A(C)/\alpha_0)} \quad (4)$$

98 and

$$k_0(C) = \frac{v_r^2}{\alpha_0} \frac{1}{(1 + \alpha_A(C)/\alpha_0)^2} \int_0^{\infty} dt K(t) e^{-(\alpha_0 + \alpha_A(C))t} \quad (5)$$

99 For  $k_0$  the authors approximate the integral when  $\alpha_A(C) \approx \alpha_0$  (the ‘efficient limit’) to  
 100  $\int_0^{\infty} dt K(t) e^{-(\alpha_0 + \alpha_A(C))t} \approx 1 - \kappa \alpha_A(C)/\alpha_0$  with  $\kappa = \int_0^{\infty} dt' \alpha_0 t' K(t') e^{-\alpha_0 t'} / \int_0^{\infty} dt' K(t') e^{-\alpha_0 t'}$ .  
 101 Using a previously proposed parameterization of  $K(t) = N_0 e^{-\alpha_0 t} (1 - A_0(\alpha_0 t + 1/2\alpha_0^2 t^2))$ <sup>8</sup> we  
 102 find that  $\kappa = 0.1$  ( $A_0 = 0.5$ ). Thus,

$$k_0(C) \approx \frac{v_r^2}{\alpha_0} \frac{(1 - \kappa \alpha_A(C)/\alpha_0)}{(1 + \alpha_A(C)/\alpha_0)^2} \quad (6)$$

103 The authors then postulate that

$$\alpha_A(C) = \alpha_0 e^{(C-C_1)/C_0} \quad (7)$$

104 and empirically determine the contents  $C_1$  and  $C_0$  by fitting the measured dependence of  
 105 front migration rate on agar concentration. They compute  $C_1 = 0.28\%$  and  $C_0 = 0.035\%$ .

106 They show that the efficient limit described above captures the dependence of the rate of  
107 migration on agar concentration as well as changes in the shape of the front due to changes  
108 in agar concentration. Using equations (4), (6) and (7) for our conditions ( $C = 0.3\%$ ) with  
109 previously measured values of  $D_b$  and  $k_0$  in liquid,<sup>9</sup> we estimate  $D_b$  and  $k_0$  in the presence  
110 of agar for both rich and minimal medium conditions.

111 To generate the heat maps shown in Figures 2 and 4 of the main text, we varied  $|v_r|$  and  
112  $k_g$ . Tumble frequency ( $\alpha_0$ ) was assumed fixed for these simulations since changes in tumble  
113 frequency alone were found to drive only small changes in front migration rate (Figure 2 -  
114 figure supplement 3). We therefore recomputed  $D_b$  and  $k_0$  for each value of  $|v_r|$  and  $k_g$  and  
115 performed a simulation of front migration.

116 To estimate how the evolution of run tumble statistics at the single-cell level (Figure  
117 3, main text) in liquid changed  $D_b$  and  $k_0$  we assumed  $K(t)$  and  $\alpha_A$  were unchanged by  
118 selection. We recomputed equations (4) and (6) using the observed changes in  $\alpha_0$  and  $|v_r|$   
119 (Tables 12 and 13, main text). We then simulated equations 1 and 2 from the main text  
120 using these values and the measured change in growth rates (Figure 3(e-f), main text). We  
121 found that these changes predicted an increasing rate of migration with selection which  
122 was qualitatively correct (Figure 4 - figure supplement 1). We note that our single-cell  
123 measurements were made in a uniform environment without spatial gradients in attractants  
124 and we therefore cannot determine whether or not  $K$  has changed during selection.

## 125 **V. THE EFFECT OF BOUNDARY INTERACTIONS IN MICROFLUIDIC DE-** 126 **VICE ON RUN-TUMBLE STATISTICS**

127 When *E. coli* swims very close to a surface, interactions between the helical bundle and the  
128 surface can result in cells swimming in circles.<sup>10,11</sup> However, wild type cells execute tumbles  
129 even in the presence of surfaces<sup>11</sup> and previous methods for tracking single-cells similar to  
130 ours have found that cells exhibit typical run-tumble behaviors even in microfluidic devices  
131 with a floor to ceiling height as small as 4  $\mu\text{m}$ .<sup>12</sup> Our chambers are 10  $\mu\text{m}$  in depth and we  
132 typically observe run-tumble behavior similar to that shown in Figure 3 – figure supplement  
133 1. However, we did transiently observe cells “circling” likely due to close proximity to the  
134 floor or ceiling of the chamber. To check that this circling behavior was not biasing our  
135 results we devised an automated technique to detect circling. For each run event longer

136 than 10 frames we compute the sign of  $\omega(t)$  for each frame included in the run which we  
137 denote  $sign(\omega_{run}(t))$ . For each run we compute  $\xi = |\langle sign(\omega_{run}(t)) \rangle|$ .  $\xi$  is close to unity  
138 for cells that are circling and close to zero for cells that are not circling. By inspection  
139 of trajectories we determined that cells with  $\xi > 0.17$  more than 65% of the time could  
140 be regarded as circling. This classified approximately 15% of the data as circling due to  
141 boundary interactions. The data shown in Figure 3 and all supplemental figures excludes  
142 these circling cells. However, we checked that the conclusions of our study, most importantly  
143 changes in run speed, were not qualitatively altered even when we included circling cells in  
144 our analysis.

## 145 VI. COMPARISON OF RICH MEDIUM ROUND 15 STRAIN WITH RP437

146 We tested whether or not the strain selected for fast migration in rich medium differed  
147 substantially from the RP437 strain most commonly used in chemotaxis studies. We mea-  
148 sured the migration rate for RP437 to be  $0.15 \pm 0.009$  cm h<sup>-1</sup> in rich medium, approximately a  
149 factor two slower than MG1655-motile (founder strain) in identical conditions. We observed  
150 similar single-cell behavioral statistics between the two strains (Figure 1 - figure supple-  
151 ment 4) so we attributed slower migration to the reduced growth rate of RP437 relative  
152 MG1655-motile ( $1.1 \pm 0.02$  h<sup>-1</sup> and  $1.24 \pm 0.02$  h<sup>-1</sup> respectively) measured in well mixed liquid  
153 culture.

## 154 VII. EXPERIMENTAL DETAILS OF MUTANT RECONSTRUCTION

155 To reconstruct point mutations in the chromosome of the founding strain, we followed a  
156 method described in Kuhlman and Cox<sup>13</sup> and outlined in the Methods section of the main  
157 text. Here we detail the experimental methods used in this reconstruction.

### 158 A. Preparation and electroporation of electrocompetent cells

159 0.5 mL of an overnight culture was added to a flask containing 30 mL of LB with appro-  
160 priate antibiotic(s) and inducer(s) and grown at 30 °C with shaking until the OD600 reached  
161 0.5 to 0.7. The flask was removed and the culture was cooled by swirling in an ice water

162 slurry for five minutes then placed on ice for ten minutes. The culture was transferred to a  
163 pre-chilled centrifuge tube and pelleted by centrifugation (5 min, 5K RPM) in a refrigerated  
164 centrifuge chilled to 4 °C. The supernatant was dumped and the cells were washed in 10 mL  
165 of ice cold 10 % glycerol. Glycerol wash was repeated twice followed by a resuspension in  
166 200  $\mu$ L. The cells were immediately placed on ice and kept cold until electroporation. Typ-  
167 ically,  $\sim$ 100  $\mu$ L of cells was mixed with  $\sim$ 5  $\mu$ L of DNA in a pre-chilled microcentrifuge tube  
168 before being transferred to a pre-chilled 0.1 cm gap electroporation cuvette (USA Scientific)  
169 and electroporated at 2 kV in an Electroporator 2510 (Eppendorf).

## 170 **B. Synthesis and integration of the landing pad**

171 Custom primers were designed and ordered from Integrated DNA Technologies. These  
172 primers contain homologies to *tetA* flanking regions on template plasmid pTKLP-*tetA* as  
173 well as 50bp homologies just upstream/downstream of the desired chromosomal mutation  
174 site. PCR using these primers generated the linear landing pad fragment for each desired  
175 mutation site. Purification was performed with AmpureXP magnetic beads followed by  
176 a DpnI digest and an additional AmpureXP cleanup. Fragment length was confirmed by  
177 1 % agarose gel. Electrocompetent founder+pTKRED cells were prepared from frozen stock,  
178 with IPTG induction of the  $\lambda$ -Red enzymes on pTKRED. These cells were transformed with  
179 the landing pad fragment. After 4h outgrowth on the bench, half the culture was pelleted in  
180 a microcentrifuge (1min, 14000 RPM). 410  $\mu$ L of the supernatant was removed, cells were  
181 resuspended in the remaining media and plated on LB+tetracycline+spectinomycin plates.  
182 The remaining half of the culture was plated in the same way after an additional day of  
183 outgrowth on the bench. The plates were grown at 30 °C and colonies typically took a few  
184 days to appear at this step. PCR and 1 % agarose gel electrophoresis on resultant colonies  
185 was used to confirm successful landing pad integration at the desired site. The presence of  
186 a secondary band consistent with the wild-type revealed heterogeneity within transformant  
187 colonies. The landing pad strain was therefore purified by overnight growth (30 °C, shaking)  
188 in LB+tetracycline+spectinomycin followed by serial dilution and plating.



189 **C. Integration of desired mutation**

190 A 70bp oligo containing each desired mutation was designed following the design consider-  
191 ations outlined in Sawitzke *et al.*<sup>14</sup> as closely as possible and ordered from Integrated DNA  
192 Technologies. Electrocompetent founder+pTKRED+LP cells were prepared from frozen  
193 stock, with 2 mM IPTG induction of the  $\lambda$ -Red enzymes as well as 0.4% w/v L-Arabinose  
194 induction of Isce-I from pTKRED. These cells were electroporated with the oligo and 1 mL  
195 of LB was immediately added. The cells were then transferred to a flask containing 100 mL  
196 of RDM+0.5% glycerol with inducers and antibiotic. The flask was grown for 2 h at 30 °C  
197 with shaking before adding NiCl<sub>2</sub>.

198 The appropriate NiCl<sub>2</sub> concentration was determined in a separate experiment wherein  
199 growth of founder+pTKRED as well as founder+pTKRED+LP, for each landing pad con-  
200 struct, was assayed in the supplemented RDM described above. At each day of the out-  
201 growth until successful transformants were identified, a sample was diluted and plated on  
202 LB+spectinomycin. Colonies from these plates were screened for tetracycline resistance.  
203 A few tetracycline-susceptible colonies were checked for successful landing pad removal by  
204 colony PCR and 1% agarose gel electrophoresis. Finally the pTKRED plasmid was cured  
205 by growth at 42 °C. Mutations were confirmed by Sanger sequencing.

206 **VIII. MODELING EVOLUTION OF CORRELATED TRAITS**

207 The model of evolving correlated traits is derived in detail elsewhere.<sup>15</sup> We infer con-  
208 straints on entries in the matrix  $G$  by comparing the predicted ( $\hat{\phi}_{pred}$ ) direction of pheno-  
209 typic evolution to that which we observed ( $\hat{\phi}_{obs}$ ). We determined the observed direction of  
210 phenotypic evolution by linear regression of the data shown in Figure 4(a) of the main text.  
211 We then compute the dot product  $\hat{\phi}_{pred} \cdot \hat{\phi}_{obs}$  over a range of values of  $\sigma_{\bar{k}_g}$ ,  $\sigma_{|\bar{v}_r|}$  and  $\rho$  (Figure  
212 6 – figure supplement 2).

213 We note that the migration rate in minimal media as a function of  $|v_r|$  and  $k_g$  contains a  
214 strong nonlinearity around a growth rate of 0.2 h<sup>-1</sup>. This transition occurs between regimes  
215 where bacterial transport is dominated by growth and diffusion (founder) and chemotaxis  
216 (evolved).<sup>5</sup> The characteristic timescale for the migration process is set by the growth rate  
217  $\tau \sim 1/k_g$  and the length scale by the distance a cell diffuses over its lifetime  $l \sim \sqrt{D_b/k_g}$ .

218 For the founding strain in minimal medium,  $\tau \sim 10$  h while  $l \sim 0.5$  cm. In this case  $\nabla c$   
 219 remains small and transport is dominated by diffusion and subsequent growth. As growth  
 220 rates increase during selection and  $D_b$  decreases only modestly (see Table 13, main text)  
 221 and  $\tau \sim 3$  h and  $l \sim 0.15$  cm. In this case chemotactic transport becomes substantial due  
 222 to gradients that form over lengthscale  $l$  and we observe this transition to traveling waves  
 223 around  $k_g \sim 0.2$  h<sup>-1</sup>. We note that this transition predicted by our model is also observed  
 224 experimentally (Figure 1(e), main text).

225 However, as a result of this non-linearity our estimate of  $\vec{\beta}$  in minimal medium relies on  
 226 a poor linear fit (Figure 6 – figure supplement 1). To asses whether or not this poor ap-  
 227 proximation might alter our conclusions we performed stochastic simulations of an evolving  
 228 population that did not require us to make a linear approximation to infer  $\vec{\beta}$ . To accomplish  
 229 this we generated a population of 1000 individuals whose phenotype was drawn from the  
 230 multivariate normal distribution  $\mathcal{N}(\vec{\phi}^f, G)$  where  $\vec{\phi}^f$  is the mean phenotype of the founding  
 231 population and  $G$  is the genetic covariance matrix discussed in the main text. Using the  
 232 predicted migration rate as a function of  $|v_r|$  and  $k_g$  as a fitness landscape (Figure 2(b),  
 233 main text) we then select that fastest 1 % of the population. From this selected population  
 234 we compute a new  $\vec{\phi}^1$  and generate a second population from the distribution  $\mathcal{N}(\vec{\phi}^1, G)$ .  
 235 The process is repeated iteratively. The results of these simulations are shown in Figure 6  
 236 - figure supplement 3. We find that our qualitative conclusions hold. Large negative values  
 237 of the train correlation coefficient ( $\rho < -0.9$ ) and  $\sigma_{\tilde{k}_g} > \sigma_{|\tilde{v}_r|}$  result in evolution in the same  
 238 direction we observe experimentally. We note that in these simulations populations with  
 239 finite  $\sigma_{|\tilde{v}_r|}$  and  $\rho > -1$  are able to evolve both higher run speeds and growth rate.

## 240 IX. ESTIMATED CHANGE IN DRAG DUE TO CHANGE IN GROWTH RATE

241 For a bacterium swimming at constant speed  $u$  (at low Reynolds number) the propulsion  
 242 force provided by the flagella equals the drag force from the fluid. Thus, we can write:

$$u = \frac{F_{flag}}{F_D/u} \quad (8)$$

243 The ratio of swimming speeds in a given medium for evolved and founding strains is therefore:

$$\frac{u^{ev}}{u^f} = \frac{F_{flag}^{ev} (F_D^{ev}/u^{ev})^{-1}}{F_{flag}^f (F_D^f/u^f)^{-1}} \quad (9)$$

244 If we assume the flagellar force is unchanged with selection, then we have:

$$\frac{u^{ev}}{u^f} = \frac{F_D^f/u^f}{F_D^{ev}/u^{ev}} \quad (10)$$

245 The drag force on an ellipsoid moving along its symmetry axis at speed  $u$  in a fluid with  
246 viscosity  $\mu$  is given by equation (2.3) in R.G. Cox:<sup>16</sup>

$$F_D = 16\pi\mu au \left[ \frac{-2\chi}{\chi^2 - 1} + \frac{2\chi^2 - 1}{(\chi^2 - 1)^{\frac{3}{2}}} + \ln \frac{\chi + \sqrt{\chi^2 - 1}}{\chi - \sqrt{\chi^2 - 1}} \right]^{-1} \quad (11)$$

247 Where  $\chi$  is the ratio of the major axis (half-length)  $b$  to the minor axis (half-width)  $a$ .

$$\chi = \frac{b}{a} = \frac{l/2}{w/2} = \frac{l}{w} \quad (12)$$

248

249 It can be shown that (11) is equivalent to:

$$F_D = 6\pi\mu au K' \quad (13)$$

250 where

$$K' = \frac{\frac{4}{3}(\chi^2 - 1)}{\frac{2\chi^2 - 1}{\sqrt{\chi^2 - 1}} \ln \left[ \chi + \sqrt{\chi^2 - 1} \right] - \chi} \quad (14)$$

251 Using the above, we have:

$$\frac{u^{ev}}{u^f} = \frac{w_f K'_f}{w_{ev} K'_{ev}} \quad (15)$$

252 Taheri-Araghi *et. al*<sup>17</sup> figure S1(A) gives the average length and width of an *E. coli* as a  
253 function of its growth rate:

$$l = 2.08 * 2^{0.41 * \frac{\text{divisions}}{\text{hour}}} \mu\text{m} = 2.08 * 2^{0.41 * \frac{r}{\ln 2}} \mu\text{m} \quad (16)$$

$$w = 0.41 * 2^{0.36 * \frac{\text{divisions}}{\text{hour}}} \mu\text{m} = 0.41 * 2^{0.36 * \frac{r}{\ln 2}} \mu\text{m} \quad (17)$$

254 Using this expression for the width, we have:

$$\frac{u^{ev}}{u^f} = \frac{K'_f}{K'_{ev}} * 2^{0.519(r_f - r_{ev})} \quad (18)$$

From our growth rate experiments, we have:

255

$$256 \quad r_{LB}^f = 1.24 \text{ h}^{-1} \quad r_{gal}^f = 0.08 \text{ h}^{-1}$$

$$r_{LB}^{ev} = 1.09 \text{ h}^{-1} \quad r_{gal}^{ev} = 0.40 \text{ h}^{-1}$$

257

258 Using these values, we can calculate  $\chi$  (and therefore  $K'$ ) from equations (16) and (17) and  
259 plug these into (18). Doing this, we find that:

$$260 \frac{u_{founder}^{LB, ev}}{u_{founder}^{LB}} = 1.059$$

$$261 \frac{u_{founder}^{gal, ev}}{u_{founder}^{gal}} = 0.884$$

262 We see that the change in drag due to the change in cell size that we calculate using (16),(17)  
263 and our growth rate data would only account for a 6% swimming speed increase in LB and  
264 a 12% swimming speed decrease in galactose. We note that the growth rates of our strains  
265 in rich medium (LB) lie within the range of growth rates measured by Taheri-Araghi *et.*  
266 *al*, however the growth rates in galactose minimal medium are significantly slower. Finally,  
267 since we have not measured cell size in our evolved strains we cannot definitively rule changes  
268 in size as a mechanism for the trade-off observed here.

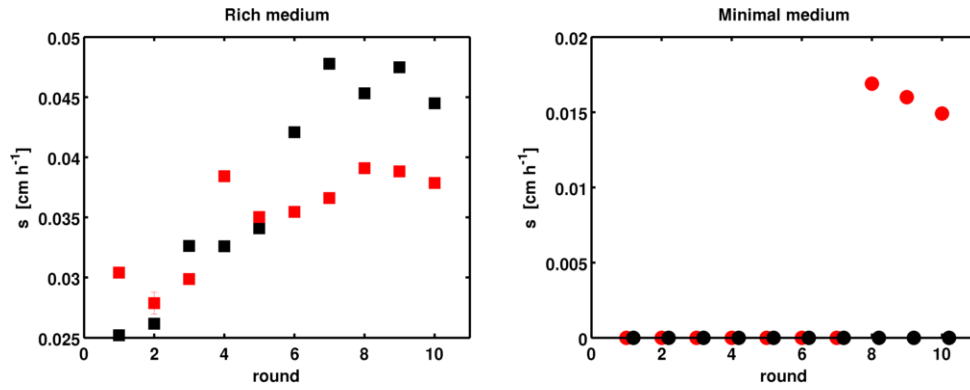

**Figure 1 - figure supplement 1. Selection with non-chemotactic ( $\Delta cheA-Z$ ) mutant:** Front migration rates of non-chemotactic mutants in 0.3% w/v agar at 30 °C with LB (left panel) and M63 0.18mM galactose (right panel). Errors are smaller than the size of the markers, except for the red replicate in rich medium at round 2. Red and black correspond to two independent selection experiments. Note the vertical scales. In minimal medium zero migration rate denotes plates where density increased in the vicinity of the site of inoculation but no migration was observed. In these cases no measurable migration rate was obtained.

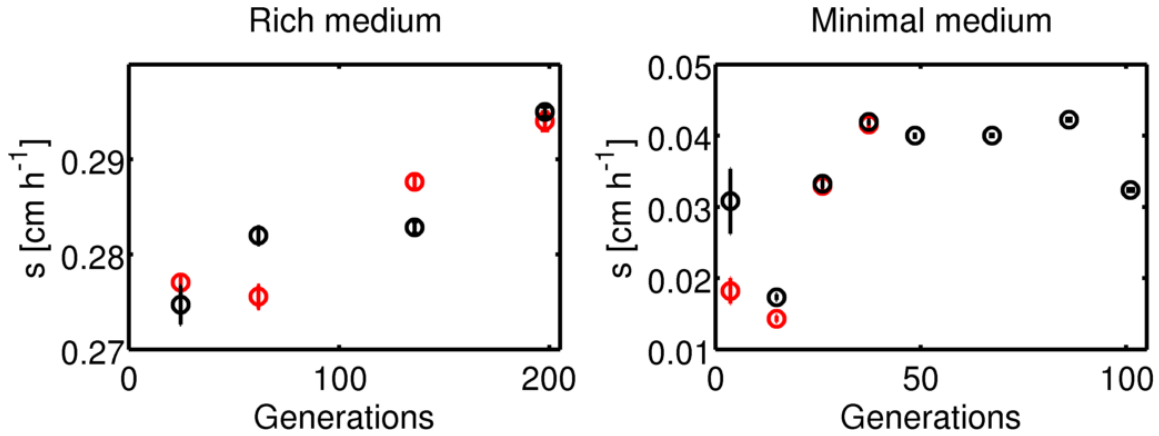

**Figure 1 - figure supplement 2. Change in migration rate during long-term liquid culture:** (left) The founder strain (Figure 1, main text,  $s = 0.3 \pm 0.01 \text{ cm h}^{-1}$ ) was inoculated into a turbidostat and continuously cultured in LB at 30 °C for approximately 200 generations. Samples were periodically drawn from the turbidostat and used to inoculate 0.3% w/v agar LB plates. Migration was recorded via webcam as described in the main text. Error bars are standard errors from regression of radius with time. Note the scale on the y-axis. (right) Identical experiment in minimal medium conditions. Founding strain was grown in a single chemostat (doubling time 6.4 h) in minimal medium for 100 generations. Plates were inoculated from samples drawn from the chemostat, two plates at each time point for the first four time points and then one plate at each time point. The last four time points (where the rate appears to saturate) exhibit a slower migration rate than the round 10 migration rates in Figure 1(e) ( $p = 0.02$ ).

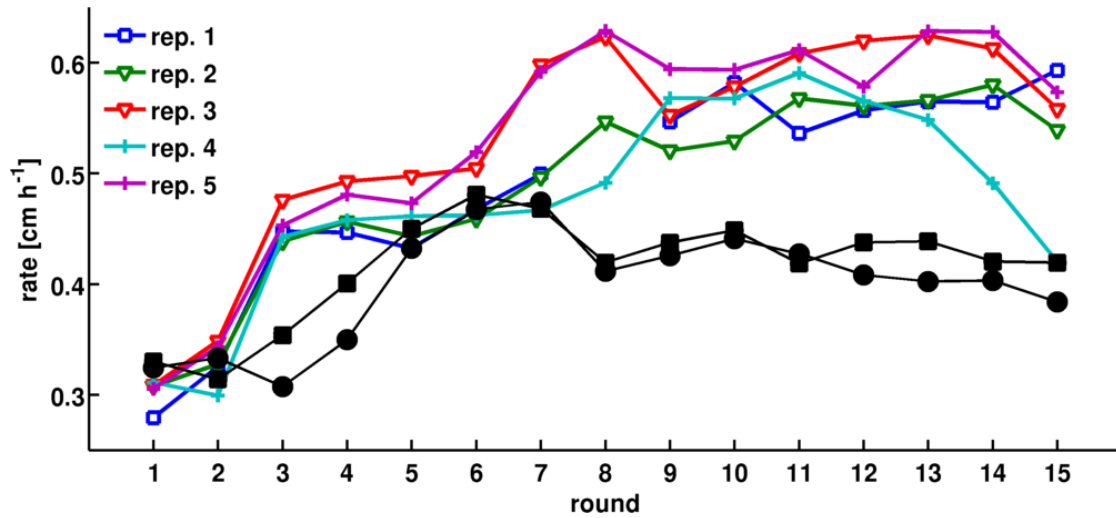

**Figure 1 - figure supplement 3. Adaptation in rich medium depends on sampling location:** Migration rate as a function of the round of selection. Colored traces are reproduced from Figure 1 in the main text. Black circles and squares are two replicate selection experiments where populations are sampled halfway between the center of the colony and the outer edge after each round of selection.

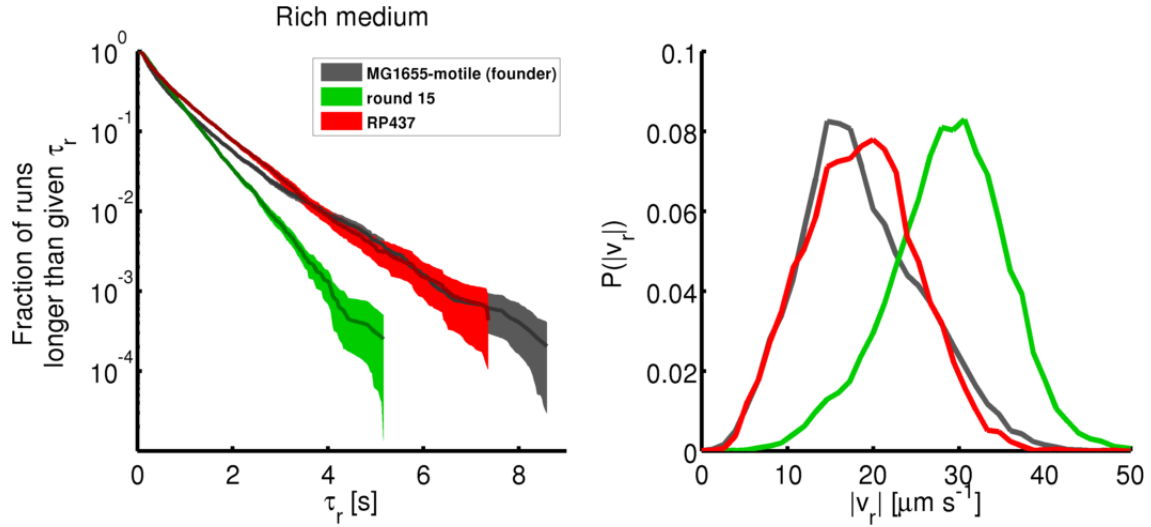

**Figure 1 - figure supplement 4. Comparison of founding and evolved strains to RP437: Single-cell swimming in rich medium:** (left) Run duration distributions identical to those shown in Figure 3(a-b) of the main text. 77 RP437 individuals were tracked from a culture at the same optical density as founder and round 15 (replicate 1). A total of 9218 run events were recorded. The average  $\pm$  standard deviation in run duration for RP437 is  $0.76 \pm 0.82$  s. (right) Comparison of run speeds for the same three strains. RP437 has an average  $\pm$  standard deviation in run speed of  $18.58 \pm 6.4 \mu\text{m s}^{-1}$ . The average run duration for RP437 exceeds that of round 15 ( $p < 10^{-4}$ ) and the average run speed is smaller than that of round 15 ( $p < 10^{-4}$ ).



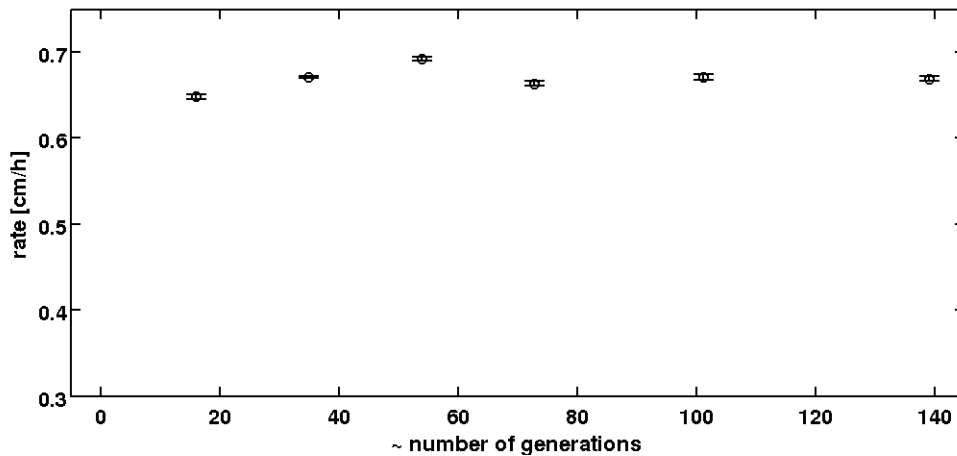

**Figure 1 - figure supplement 5. Round 15 Persistence of rich medium fast migrating phenotype in rich medium:** A strain isolated after 15 rounds of selection in rich medium (Figure 1(c), replicate 1, main text,  $s = 0.6 \text{ cm h}^{-1}$ ) was inoculated into a turbidostat and continuously cultured in LB at  $30^\circ\text{C}$  for approximately 140 generations. The number of generations was estimated assuming a constant generation time of 36 min. Samples were periodically drawn from the turbidostat and used to inoculate 0.3% w/v agar LB plates. Migration was recorded via webcam as as described in the main text. Error bars are standard errors from regression of radius with time.

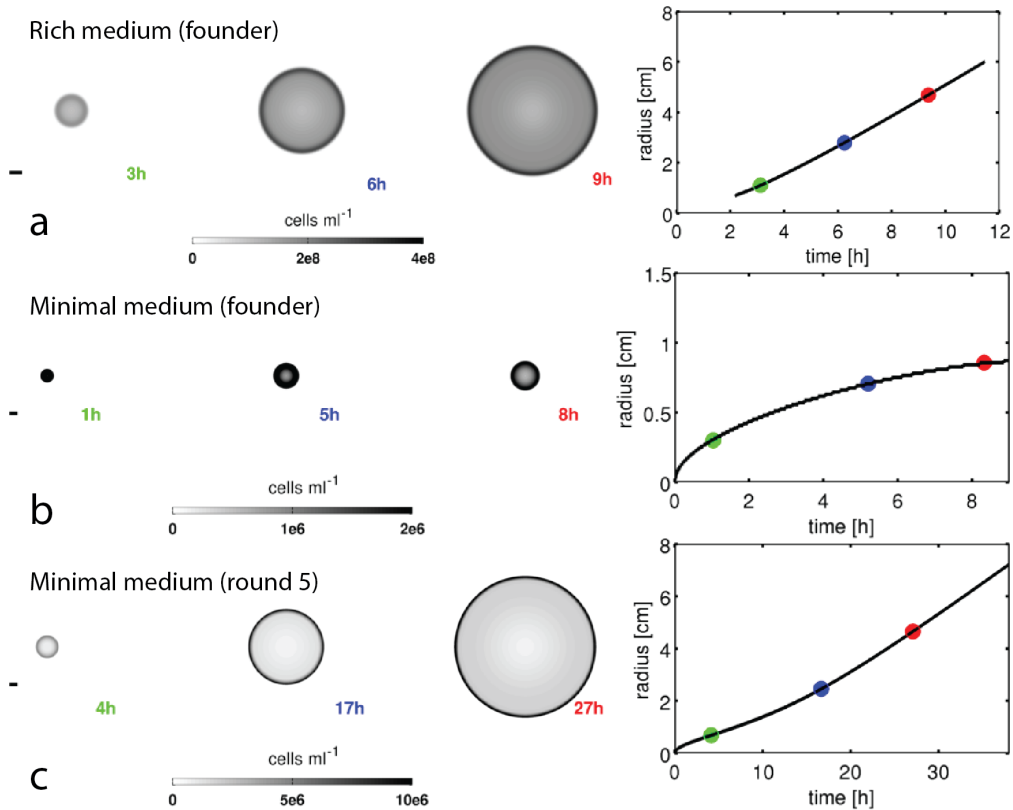

**Figure 2 - figure supplement 1. Reaction-diffusion model recapitulates qualitative features of colony expansion:** Results from numerical simulations of the reaction-diffusion model in the main text. Simulations for founding strain in rich medium (a), founding strain in minimal medium (b), and round 5 strain in minimal medium (c) are shown. Three snapshots of  $\rho(\mathbf{r}, t)$  for each simulation are shown as greyscale heatmaps (note independent color maps). The panel on the right in (a-c) shows the location of the front in time (black trace) and the time points corresponding to the three snapshots are labeled by the colored points. The parameters for each simulation are given in Table 10 and 11 of the main text. The founding strain in minimal medium exhibits diffusive transport due to slow growth, this is also observed experimentally (Figure 1, main text).

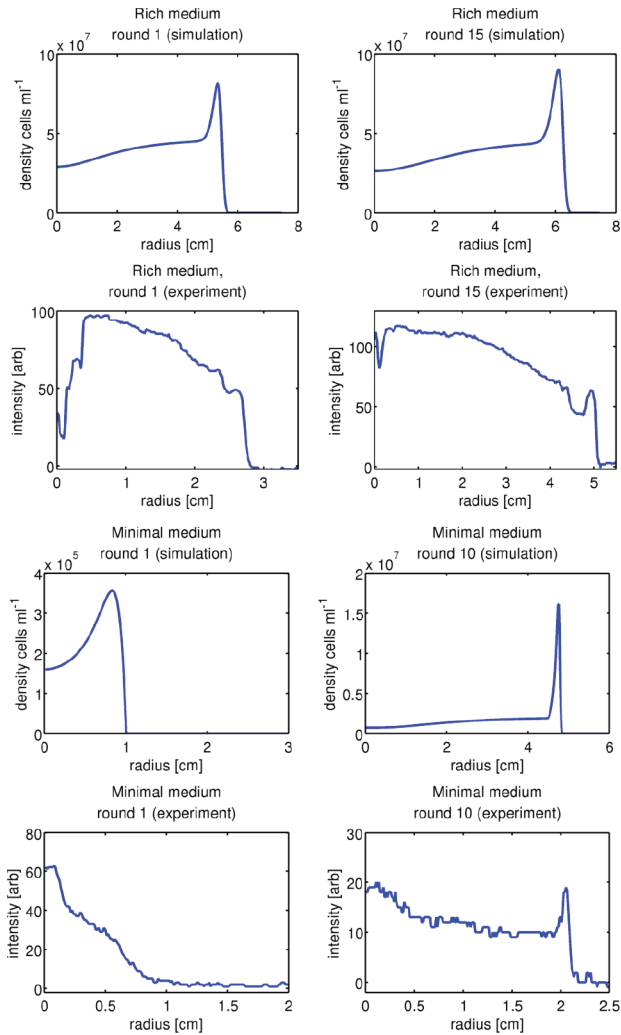

**Figure 2 - figure supplement 2. Comparison of front profiles from simulation and experiment:** Upper four panels show front density profiles from simulation and experiment for the rich medium condition. Left column shows round 1 and right column round 10. Simulation profiles are taken from time points after a constant rate of expansion has been attained. Experimental front profiles are taken at the end of colony expansion (12 hours). In the experimental front profiles the high density regions arise from metabolism of amino acids other than serine. The lower four panels are identical to the upper four but are taken from minimal medium simulations and experiments.

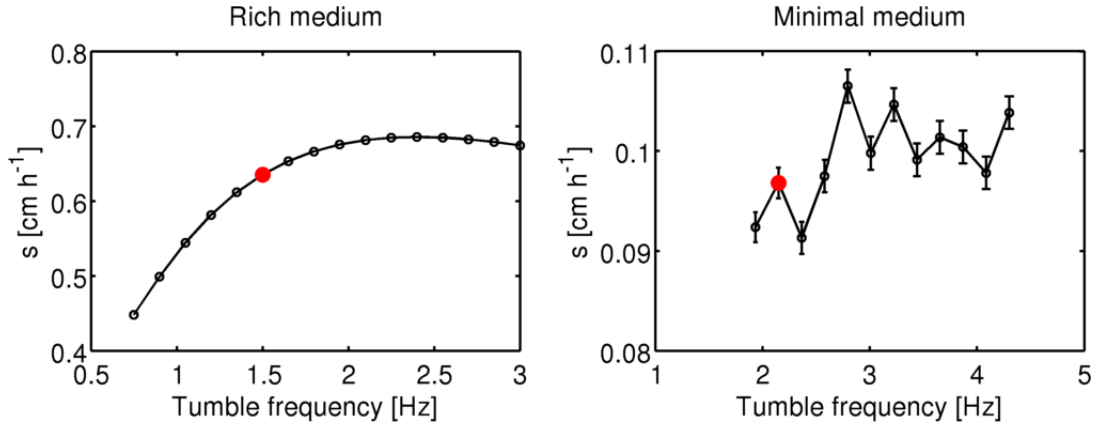

**Figure 2 - figure supplement 3. Simulation of migration rate versus tumble frequency:** Using the formalism of Croze *et al.* migration rate as a function of tumble frequency (Section IV) was computed using the reaction-diffusion model presented in the main text. Panels show migration rate ( $s$ ) as a function of tumble frequency ( $\alpha_0$ ) for rich medium and minimal medium conditions. Red dots indicate measured tumble frequency in each condition (Figure 3, main text). Error bars in the left panel are smaller than the size of the markers. Error bars in the right panel are standard errors from a linear regression on the front location in time. The non-monotonic variation of migration rate with tumble frequency in minimal medium results from the slight curvature in the front location as a function of time in these conditions (see Figure 2 - figure supplement 1 (right panel)).

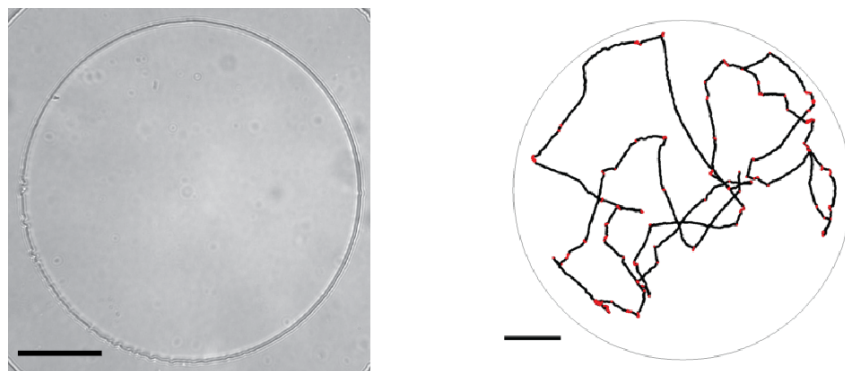

**Figure 3 - figure supplement 1. Microfluidic device and single-cell swimming trajectory:** (left) Bright-field image at 20 $\times$  magnification of the PDMS microfluidic chamber used to trap single bacteria. The boundary of the chamber can be seen as the high contrast circle. Scale bar is 50  $\mu$ m. (right) A segmented trajectory of a single cell in a chamber like the one shown on the left. Dots indicate locations of the centroid. Black portions indicate running events and red portions tumbles. Image processing and run-tumble detection are described in the Methods section of the main text.

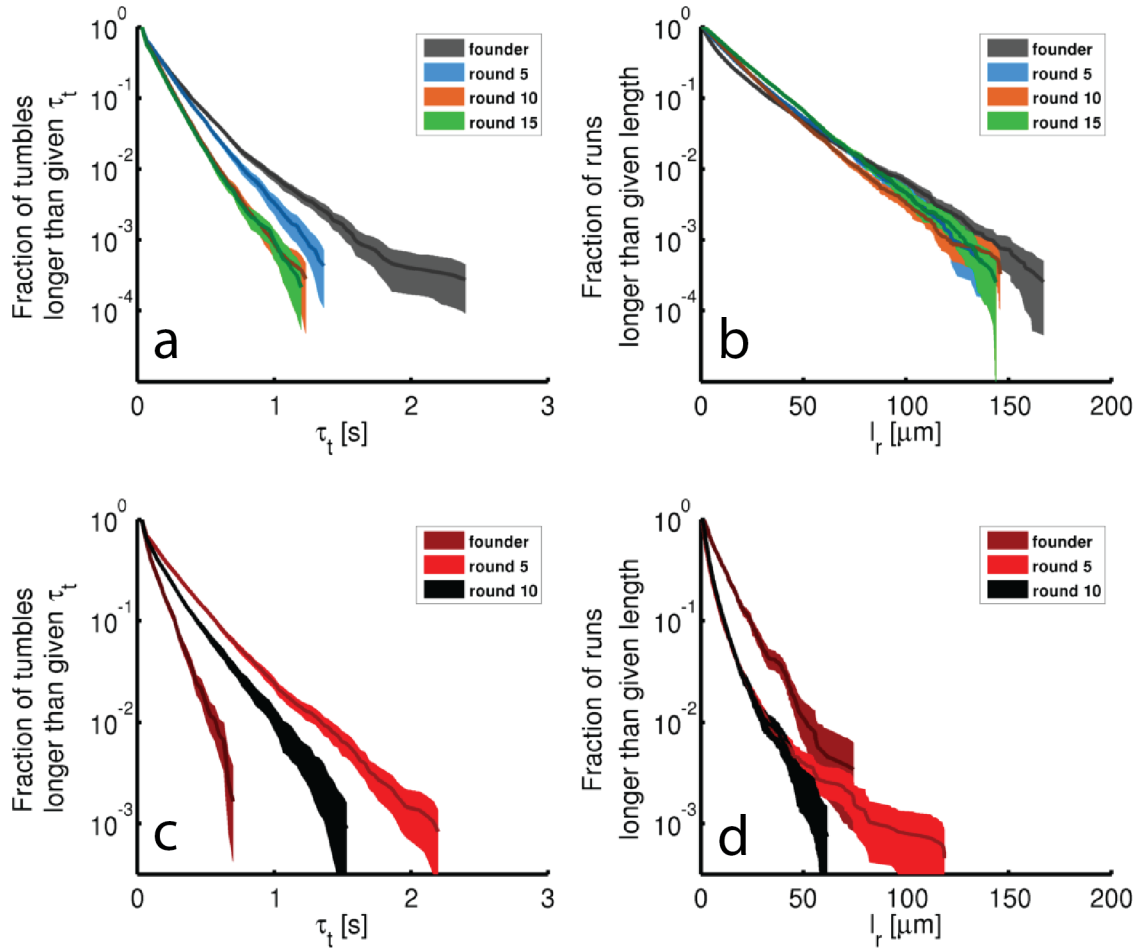

**Figure 3 - figure supplement 2. Tumble durations and run lengths for evolved strains:** Tumble durations ( $\tau_t$ ) and run lengths ( $l$ ) for single-cell tracking shown in Figure 3 of the main text. (a) shows the complementary cumulative distribution of tumble durations for rich media evolved strains. Shaded regions are 95% confidence intervals from bootstrapping. Averages and standard deviations are:  $0.18 \pm 0.2$  s,  $0.17 \pm 0.16$  s,  $0.14 \pm 0.13$  s,  $0.14 \pm 0.12$  s for founder, round 5, 10 and 15 respectively. (b) Identical to (a) except constructed for run lengths. The run length is found by computing the arc-length between tumble events for each run. The averages and standard deviations are  $13.5 \pm 17.7$   $\mu\text{m}$ ,  $16.5 \pm 17.4$   $\mu\text{m}$ ,  $16.5 \pm 16$   $\mu\text{m}$ ,  $19 \pm 17.8$   $\mu\text{m}$  respectively. (c) and (d) are identical to (a) and (b) for minimal medium evolved strains (replicate 1). The tumble durations are  $0.13 \pm 0.11$  s,  $0.25 \pm 0.27$  s,  $0.19 \pm 0.21$  s for founder, round 5 and 10. The respective run lengths are  $11 \pm 11.6$   $\mu\text{m}$ ,  $5 \pm 7.5$   $\mu\text{m}$  and  $5.3 \pm 6.6$   $\mu\text{m}$ .

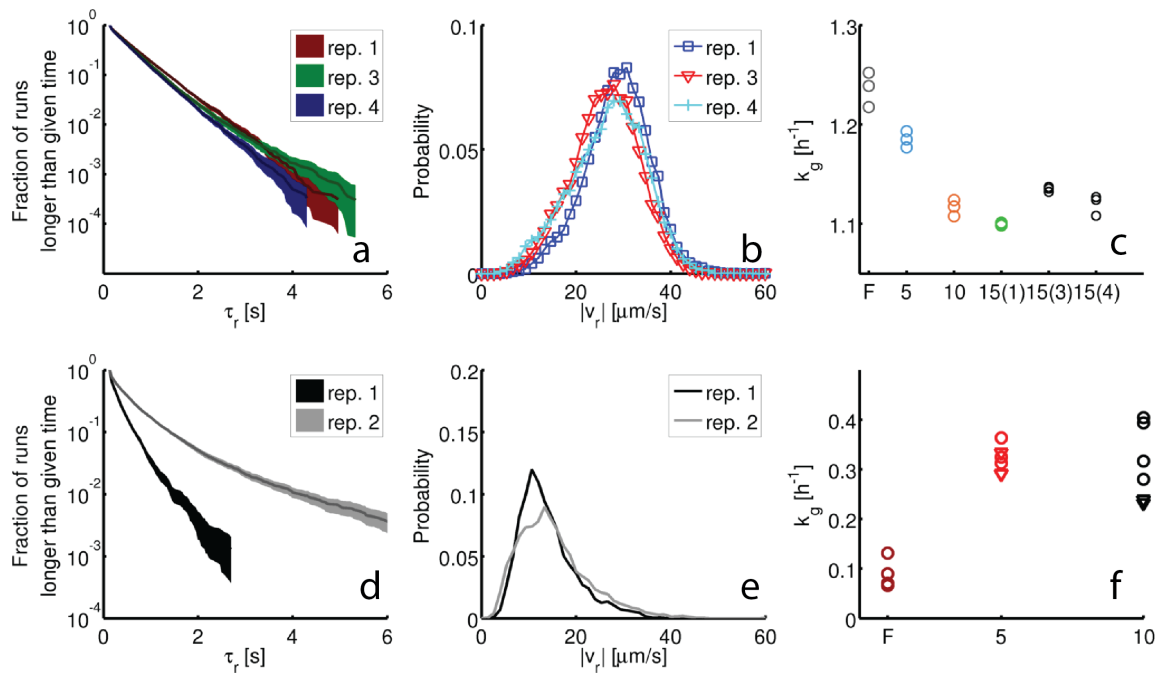

---

**Figure 3 - figure supplement 3. Reproducibility of the evolved phenotype:**

Single-cell tracking and growth rate measurements were performed on independently selected strains in rich medium (15 rounds, (a-c)) and minimal medium (10 rounds, (d-f)). Panels show run durations (a,d), run speeds (b,e) and growth rates (c,f). Single-cell tracking experiments were performed on two additional round 15 strains from the rich medium experiment (replicates 3 and 4, Figure 1(c) main text). For replicates 1, 3 and 4 - 96, 85 and 98 individuals were tracked for a total of 15 928, 16 639 and 18 171 run events respectively. (a) shows the run duration distributions for these three strains with mean $\pm$  standard deviations:  $0.65\pm 0.57$  s,  $0.60\pm 0.53$  s,  $0.57\pm 0.49$  s respectively. (b) Run speed ( $|v_r|$ ) distributions for the same three strains with means  $28.7\ \mu\text{m s}^{-1}$ ,  $26.2\ \mu\text{m s}^{-1}$  and  $26.7\ \mu\text{m s}^{-1}$  respectively. (c) maximum growth rates ( $k_g$ ) for the same two independently evolved strains (with 15(3) denoting replicate 3 and 15(4) denoting replicate 4). The decline in growth rate relative to founder is significant for both replicate 3 ( $p < 10^{-3}$ ) and replicate 4 ( $p < 10^{-3}$ ) (d-f) show swimming statistics and growth rates for independently evolved strains in minimal medium, replicate 1 and 2 correspond to Figure 1(e) in the main text. (d) Run duration distributions for constructed for 29 individuals from replicate 1 and 80 individuals from replicate 2 corresponding to 5384 and 9357 run events respectively. The with mean $\pm$  standard deviations are:  $0.34\pm 0.30$  s and  $0.65\pm 0.87$  s. (e) Run speed distributions for independently evolved minimal medium strains. Means for replicates 1 and 2 are  $13.9\ \mu\text{m s}^{-1}$  and  $15.25\ \mu\text{m s}^{-1}$  respectively. (f) Growth rates for founder, rounds 5 and 10 reproduced from Figure 1(e), main text (circles) along with growth rate measurements for strain isolated from round 5 of replicate 2 (red triangles) and round 10 of replicate 2 (black triangles). Means are  $0.3\ \text{h}^{-1}$  and  $0.24\ \text{h}^{-1}$ . Round 5 growth rates do not differ significantly ( $p = 0.24$ ) while round 10 growth rates do ( $p = 0.02$ ). Both replicate 2 strains from rounds 5 and 10 exhibit growth rates are larger than founder ( $p < 0.001$ ).



### Rich medium

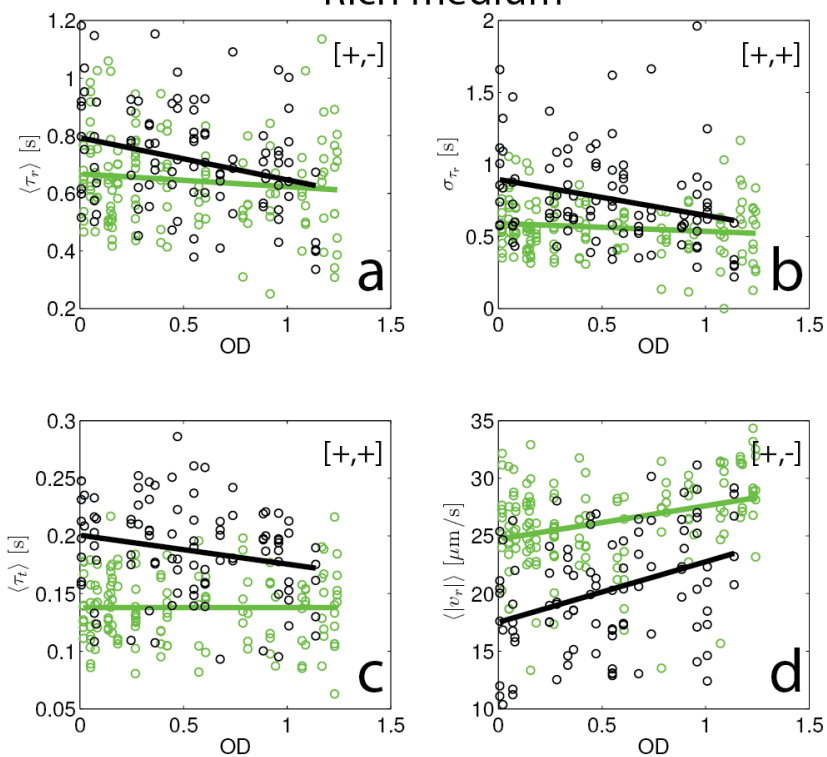

### Minimal medium

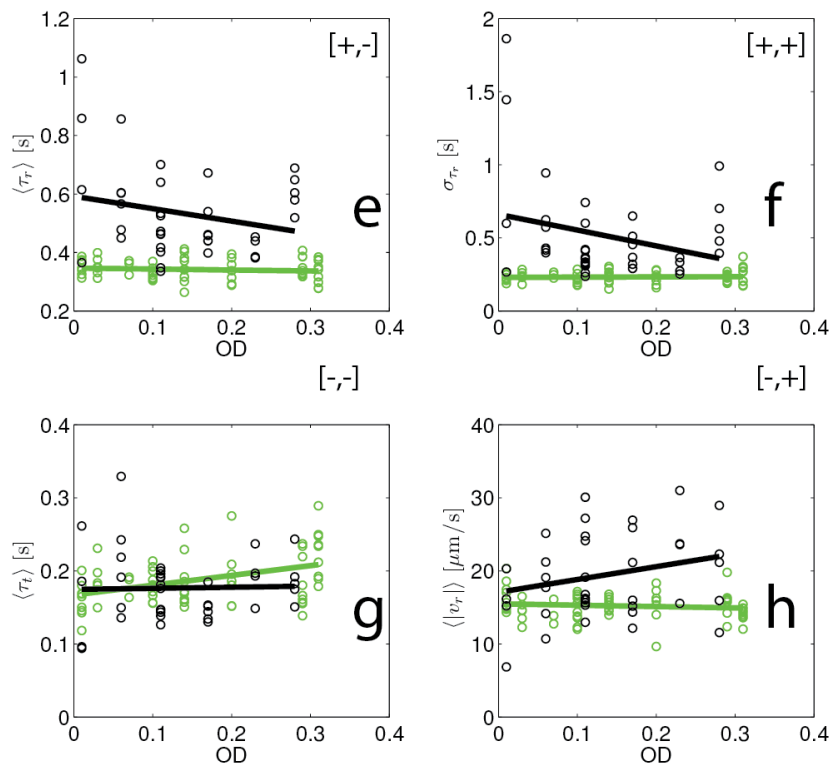

(preceding page): **Figure 3 – figure supplement 4: Swimming statistics as a function of culture density:**(a-d) Show swimming statistics ( $\tau_r$ ,  $\sigma_{\tau_r}$ ,  $\tau_t$  and  $|v_r|$ ) as a function of culture optical density for rich medium founding (green) and evolved (black, round 15, replicate 1). Each point corresponds to a single individual tracked for up to 5 minutes. 141 individuals were tracked from founder (black) and 96 individuals were tracked from round 15. Solid lines are linear regressions. (e-h) Show identical plots for minimal medium founding (green) strain and evolved (black, round 10 replicate 1). For all panels the + and – symbols in the brackets in the upper right indicate statistical significance at the 0.05 level for a difference between founder and evolved in [intercept, slope] of the linear regressions shown (F-test).

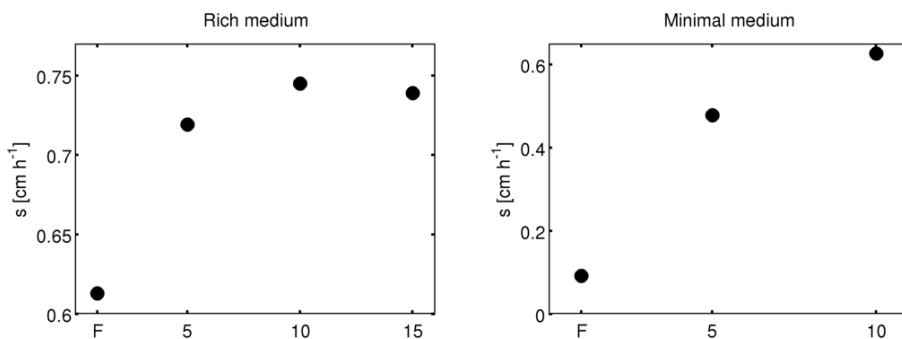

**Figure 4 - figure supplement 1. Predicted migration rates for evolved strains:** Using the reaction-diffusion model (Main text) we simulated colony expansion using the parameters shown in Tables 10 and 11 of the main text.

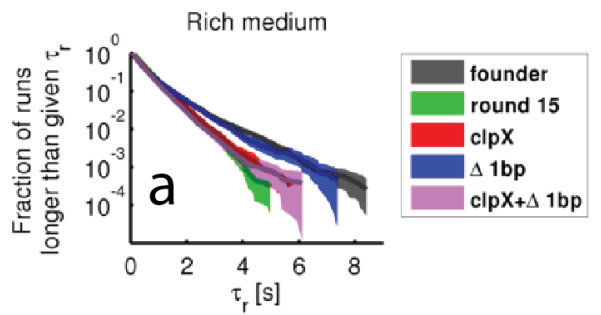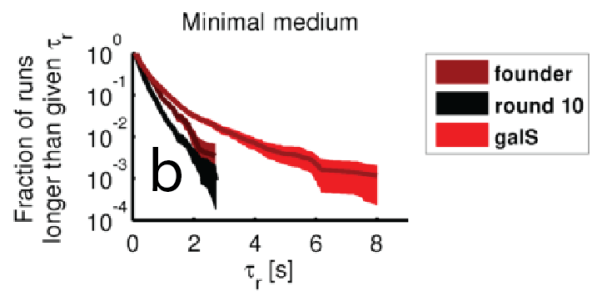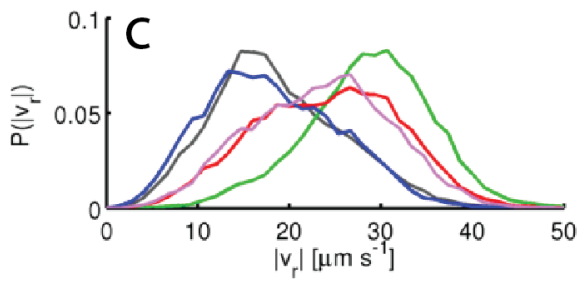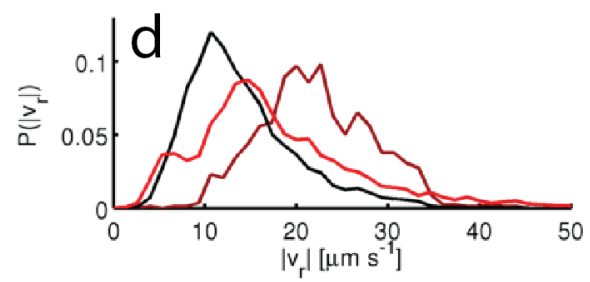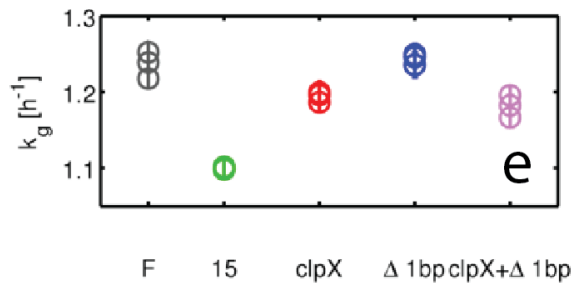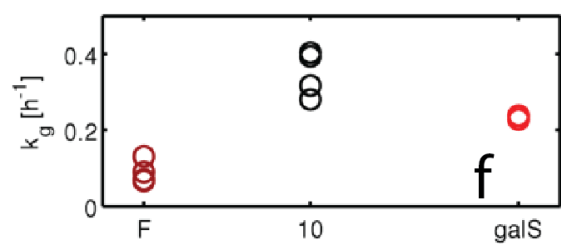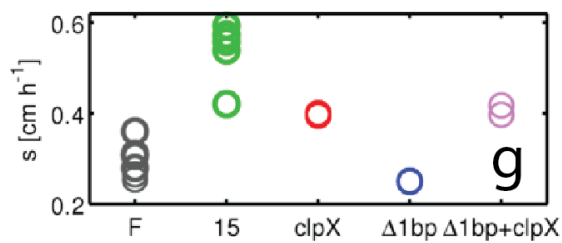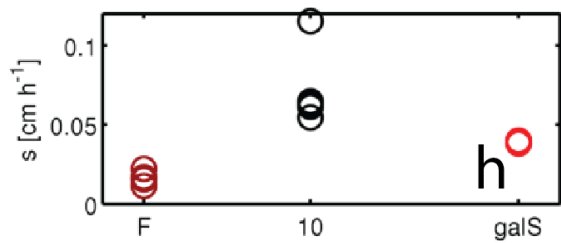

---

(preceding page): **Figure 4 – figure supplement 2: Swimming statistics, growth rates and migration rates for mutants:** Run durations ( $\tau_r$ ) and speeds ( $|v_r|$ ), growth rates ( $k_g$ ) and migration rates ( $s$ ) for four mutations reconstructed in the founder background (see Main Text). Three mutants were studied in rich medium (a,c,e,g) - *clpXE185\**, a single base pair deletion at position 523086 ( $\Delta 1\text{bp}$ ) and the double mutant, (*clpX*+ $\Delta 1\text{bp}$ ). One mutant was studied in minimal medium: *galSL22R*. In all panels phenotypes of mutants are compared to founder and the population isolated after the final round of selection in the appropriate environment. (a) shows  $c(\tau_r)$  in rich medium, means and standard deviations are:  $0.63\pm 0.6$  s,  $0.66\pm 0.91$  s and  $0.59\pm 0.55$  s for *clpX*,  $\Delta 1\text{bp}$  and *clpX*+ $\Delta 1\text{bp}$  respectively. *clpX* and *clpX*+ $\Delta 1\text{bp}$  have shorter average run durations than founder ( $p < 10^{-4}$ ) (b)  $c(\tau_r)$  in minimal medium where *galSL22R* exhibits longer runs than founder with  $0.55\pm 0.75$  s ( $p < 10^{-5}$ ). (c) gives  $P(|v_r|)$  in rich medium. Means  $\pm$  standard deviations are  $24.2\pm 7.8 \mu\text{m s}^{-1}$ ,  $18.2\pm 7.3 \mu\text{m s}^{-1}$  and  $23.4\pm 7.6 \mu\text{m s}^{-1}$  for *clpX*,  $\Delta 1\text{bp}$  and *clpX*+ $\Delta 1\text{bp}$  respectively. All mutants except  $\Delta 1\text{bp}$  exhibit faster runs on average ( $p < 10^{-5}$ ). (d)  $P(|v_r|)$  in minimal medium where *galSL22R* has a mean of  $17.6\pm 8.7 \mu\text{m s}^{-1}$  which is lower than founder  $p < 10^{-5}$ . (e) Growth rates for rich medium mutants. *clpX* and *clpX*+ $\Delta 1\text{bp}$  have lower growth rates than founder ( $p = 0.0087$  and  $p = 0.0069$ ). The  $\Delta 1\text{bp}$  mutation alone does not have a statistically significant difference in growth rate from founder ( $p = 0.53$ ). (f) shows growth rate for the *galS* mutant relative to founder and round 10. the mutant growth rate is larger than founder ( $p < 0.001$ ). (g) shows colony migration rates for mutants in rich medium. *clpX* and *clpX*+ $\Delta 1\text{bp}$  differ significantly from the migration rate of founder ( $p = 0.0021$  and  $p = 0.0017$ ).  $\Delta 1\text{bp}$  does not have a statistically significant change in growth rate. Comparisons are made between duplicate measurements for each genotype and the migration rates of all five replicate experiments in Figure 1 of the main text. (f) Shows migration rate measurements for the *galS* mutant in minimal medium compared to founder and round 10 in minimal medium. The mutant is faster than the founding strain ( $p < 10^{-3}$ ).

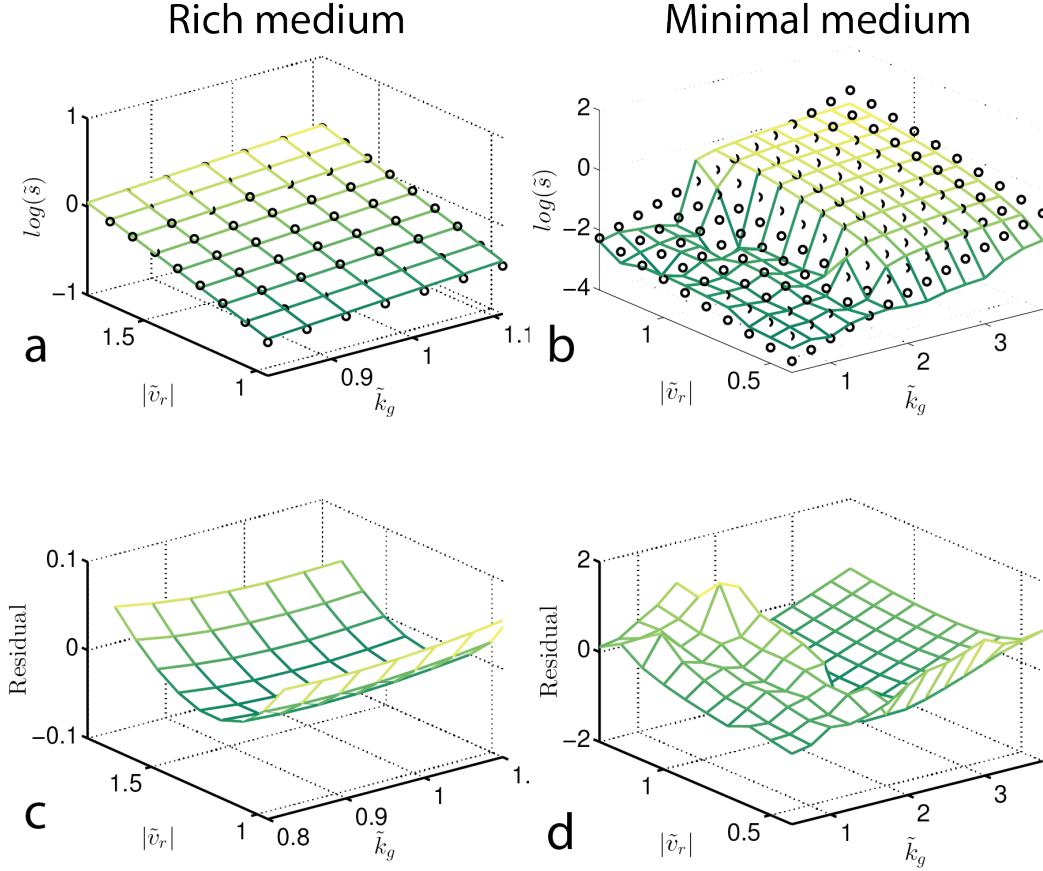

**Figure 6 - figure supplement 1. Determining  $\vec{\beta}$  from reaction-diffusion model:** Reaction-diffusion model was used to simulated migration rates. Panels (a) and (b) plot the normalized (to the founder), predicted, migration rate ( $\tilde{s}$ ) for both rich medium (a) and minimal medium (b). (a-b) are surface plots of the heatmaps shown in Figures 2 and 4 of the main text. To infer the selection pressure  $\vec{\beta}$  we fit a plane (black circles) to the surfaces shown in (a) and (b). The residuals of this fit are shown in (c) and (d) respectively. The fit for rich media is good, while the residual is large in minimal medium.

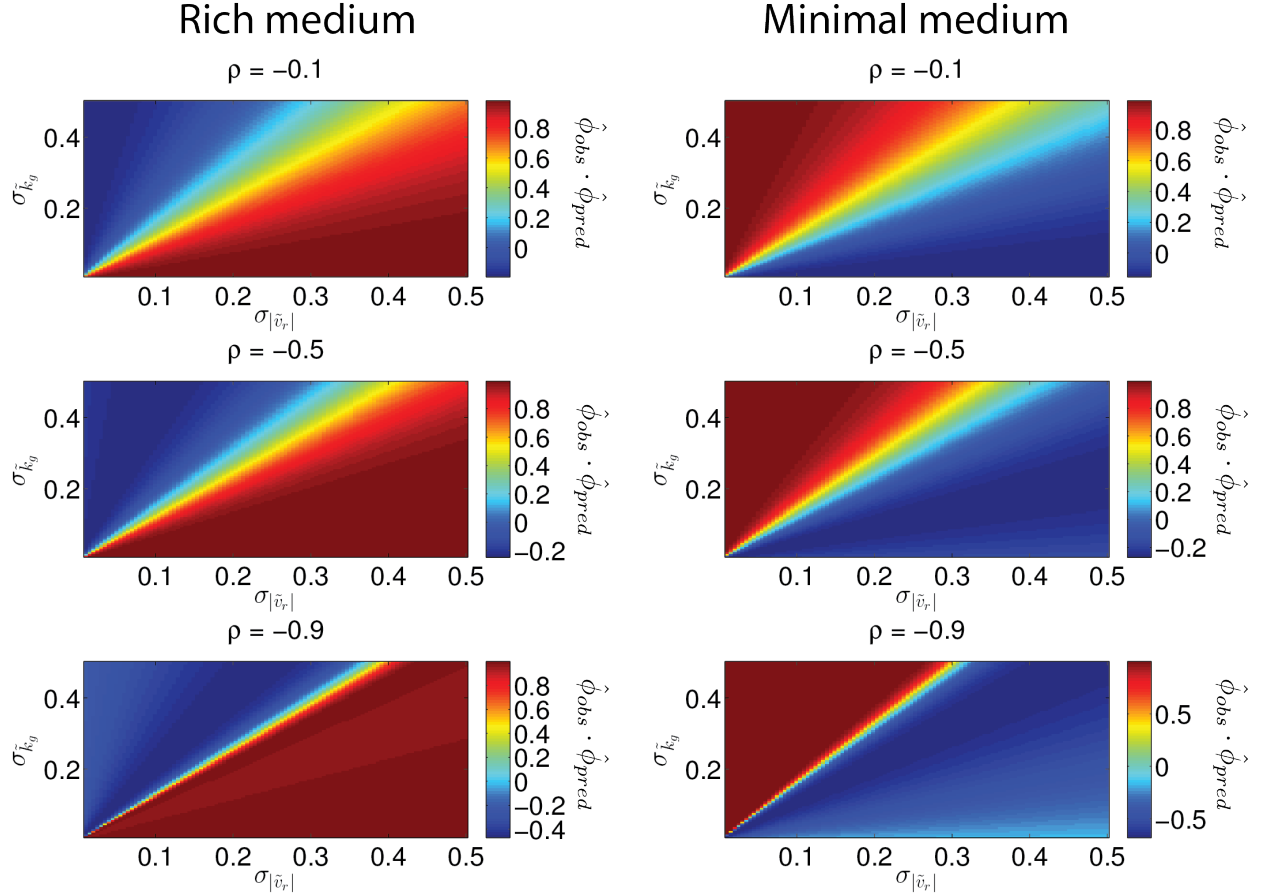

**Figure 6 - figure supplement 2. Direction of phenotypic evolution with  $\sigma_{|\bar{v}_r|}$  and  $\sigma_{\bar{k}_g}$ :** The dot product  $\hat{\phi}_{obs} \cdot \hat{\phi}_{pred}$  is plotted as a heatmap as a function of genetic variances in growth rate and run speed. Each row corresponds to a different value of the correlation coefficient ( $\rho$ ) between run speed and growth rate as labeled. The left column is for rich medium and the right column for minimal medium. When  $\hat{\phi}_{obs} \cdot \hat{\phi}_{pred} \rightarrow 1$  (dark red) this indicates regions where the predicted direction of evolution ( $\hat{\phi}_{pred}$ ) coincides with the observed direction of evolution ( $\hat{\phi}_{obs}$ ). Note our qualitative conclusions are robust to large variation in  $\rho$ .

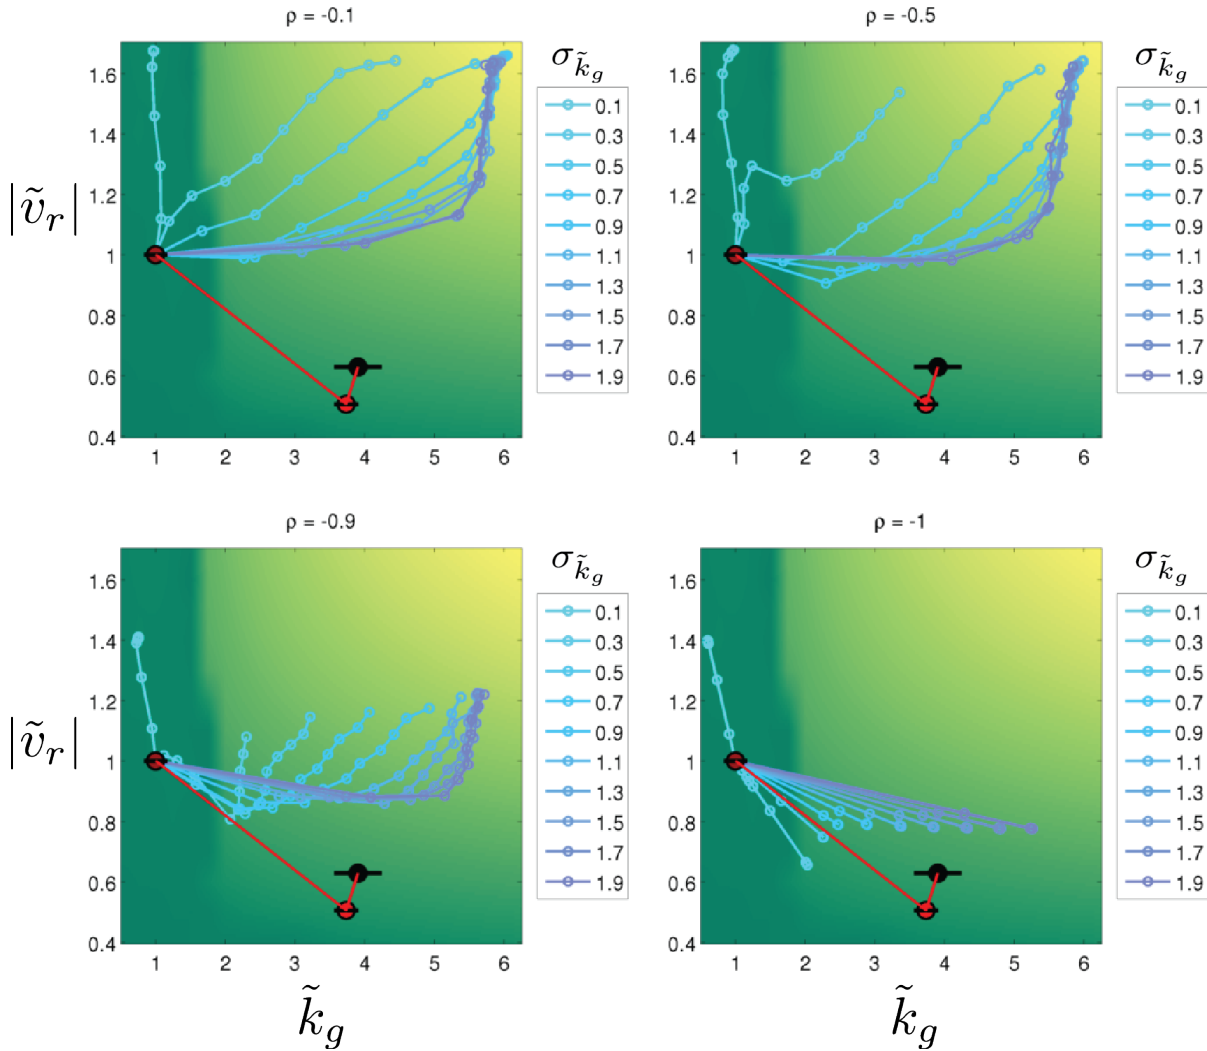

**Figure 6 - figure supplement 3. Stochastic simulations of selection in minimal medium:** Stochastic simulations of phenotypic evolution in minimal medium. Simulations were carried out as described above. For all simulations  $\sigma_{|\tilde{v}_r|} = 0.1$ . Each colored line represents a single simulation which initiates at  $[1, 1]$ . Each point is the mean phenotype for a round of selection. Colors represent different values of  $\sigma_{\tilde{k}_g}$  as shown in the legends. The green-yellow heatmap is the “fitness landscape” interpolated from the heatmap shown in Figure 2(b) of the main text. Each panel shows a simulation for different, fixed, values of the trait correlation coefficient  $\rho$ . The red line and circles show the observed phenotypic evolution in minimal medium (Figure 4(a), main text).

- 
- 269 <sup>1</sup> N. W. Frankel, W. Pontius, Y. S. Dufour, J. Long, L. Hernandez-Nunez, and T. Emonet, eLife  
270 **3**, e03526 (2014).
- 271 <sup>2</sup> L. Løvdok, M. Kollmann, and V. Sourjik, Journal of biotechnology **129**, 173 (2007).
- 272 <sup>3</sup> J. Merritt and S. Kuehn, Scientific Reports **6**, 33173 (2016).
- 273 <sup>4</sup> M. A. Rivero, R. T. Tranquillo, H. M. Buettner, and D. A. Lauffenburger, Chemical engineering  
274 science **44**, 2881 (1989).
- 275 <sup>5</sup> O. A. Croze, G. P. Ferguson, M. E. Cates, and W. C. K. Poon, Biophysical Journal **101**, 525  
276 (2011).
- 277 <sup>6</sup> A. Celani and M. Vergassola, Proceedings of the National Academy of Sciences **107**, 1391 (2010).
- 278 <sup>7</sup> J. E. Segall, S. M. Block, and H. C. Berg, Proceedings of the National Academy of Sciences of  
279 the United States of America **83**, 8987 (1986).
- 280 <sup>8</sup> D. A. Clark and L. C. Grant, Proceedings of the National Academy of Sciences of the United  
281 States of America **102**, 9150 (2005).
- 282 <sup>9</sup> T. Ahmed and R. Stocker, Biophysical Journal **95**, 4481 (2008).
- 283 <sup>10</sup> W. R. Diluzio, L. Turner, M. Mayer, P. Garstecki, D. B. Weibel, H. C. Berg, and G. M.  
284 Whitesides, Nature **435**, 1271 (2005).
- 285 <sup>11</sup> P. Frymier, R. Ford, H. Berg, and P. Cummings, Proceedings of the National Academy of  
286 Sciences **92**, 6195 (1995).
- 287 <sup>12</sup> S. Umehara, I. Inoue, Y. Wakamoto, and K. Yasuda, Biophys. J. **93**, 1061 (2008).
- 288 <sup>13</sup> T. E. Kuhlman and E. C. Cox, Nucleic Acids Research **38**, e92 (2010).
- 289 <sup>14</sup> J. A. Sawitzke, L. C. Thomason, M. Bubunencko, X. Li, N. Costantino, and D. L. Court,  
290 *Recombineering: Highly Efficient in vivo Genetic Engineering using Single-strand Oligos*, 1st  
291 ed., Vol. 533 (Elsevier Inc., 2013).
- 292 <sup>15</sup> R. Lande, Evolution **33**, 402 (1979).
- 293 <sup>16</sup> R. G. Cox, J. Fluid Mech. **44**, 791 (1970).
- 294 <sup>17</sup> S. Taheri-Araghi, S. Bradde, J. T. Sauls, N. S. Hill, and P. A. Levin, Current Biology **25**, 385  
295 (2015).
